# Supplementary material
Source: Springer Nature journal article supplement (https://www.springermedizin.de/resource/supplementary/12887_2005_99_MOESM6_ESM.pdf/9477266)
Supplement: MOESM6 [file 9477266]

### Haemoglobin < 7 g/dL

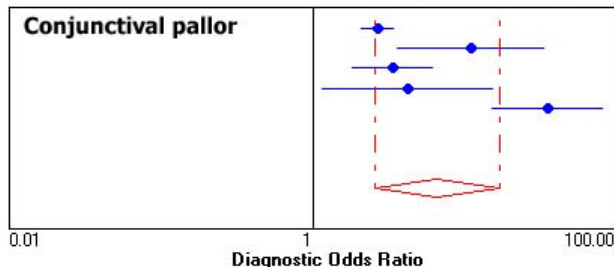

#### Diagnostic OR (95% CI)

|                  |                       |
|------------------|-----------------------|
| Desai 2002       | 2.68 (2.09 - 3.45)    |
| Getaneh 2000     | 11.12 (3.61 - 34.27)  |
| Stoltzfus 1999a  | 3.38 (1.82 - 6.27)    |
| Stoltzfus 1999b  | 4.31 (1.17 - 15.96)   |
| Stoltzfus 1999 c | 35.74 (15.32 - 83.37) |

Random Effects Model

Pooled Diagnostic Odds Ratio = 6.64 (2.56 to 17.24)

Cochran-Q = 38.02; df = 4 (p = 0.0000)

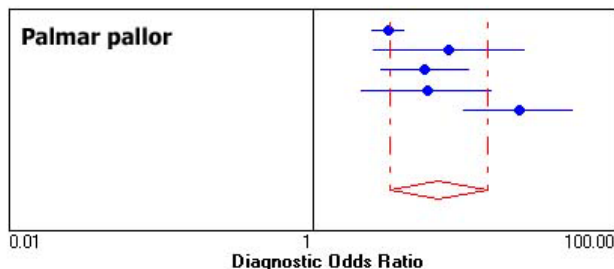

#### Diagnostic OR (95% CI)

|                 |                       |
|-----------------|-----------------------|
| Desai 2002      | 3.17 (2.45 - 4.10)    |
| Getaneh 2000    | 8.00 (2.50 - 25.60)   |
| Stoltzfus 1999a | 5.57 (2.81 - 11.04)   |
| Stoltzfus 1999b | 5.72 (2.12 - 15.38)   |
| Stoltzfus 1999c | 23.24 (10.09 - 53.55) |

Random Effects Model

Pooled Diagnostic Odds Ratio = 6.81 (3.22 to 14.39)

Cochran-Q = 23.10; df = 4 (p = 0.0001)

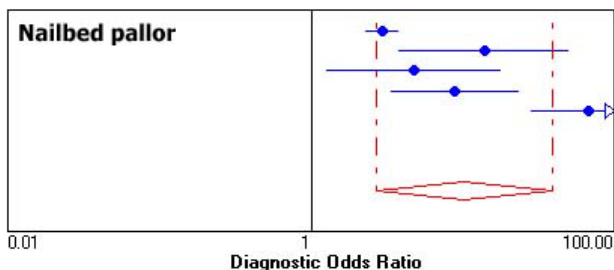

#### Diagnostic OR (95% CI)

|                 |                        |
|-----------------|------------------------|
| Desai 2002      | 2.96 (2.28 - 3.83)     |
| Getaneh 2000    | 14.02 (3.84 - 51.25)   |
| Stoltzfus 1999a | 4.82 (1.27 - 18.30)    |
| Stoltzfus 1999b | 8.98 (3.41 - 23.63)    |
| Stoltzfus 1999c | 67.70 (28.57 - 160.43) |

Random Effects Model

Pooled Diagnostic Odds Ratio = 10.29 (2.71 to 39.09)

Cochran-Q = 53.48; df = 4 (p = 0.0000)
